# Supplementary material for: Detection of male genital schistosomiasis (MGS) by real-time TaqMan® PCR analysis of semen from fishermen along the southern shoreline of Lake Malawi
Source: PubMed Central journal article supplement (PMC10394912; doi:10.1016/j.heliyon.2023.e17338), 2023-06-21
Supplement: mmc4.pdf [file mmc4.pdf]

Telephone: + 265 789 400  
Facsimile: + 265 789 431

All Communications should be addressed to:

The Secretary for Health and Population

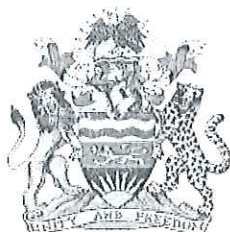

In reply please quote No.

MINISTRY OF HEALTH AND POPULATION

P.O. BOX 30377  
LILONGWE 3  
MALAWI

22<sup>nd</sup> July, 2018

Sekeleghe Kayuni  
University of Liverpool  
UK

Dear Sir,

**Re: Protocol # 17/05/1805: Multidisciplinary Studies On Male Genital Schistosomiasis (Mgs): Its Prevalence, Morbidity And Management And Interactions With HIV Viral Shedding Among Adult Fisherman Along Lake Malawi Shores In Mangochi, Malawi**

Thank you for the above titled proposal that you submitted to the National Health Sciences Research Committee (NHSRC) for review. Please be advised that the NHSRC has reviewed and approved your application for continuation of the above titled study.

- **APPROVAL NUMBER** : 1805
- The above details should be used on all correspondences, consent forms and documents as appropriate.
- **APPROVAL DATE** : 23/07/2018
- **EXPIRATION DATE**  
This approval expires on 22/07/2019. After this date, this project may only continue upon renewal. For purposes of renewal, a progress report on a standard form obtainable from the NHSRC Secretariat should be submitted one month before the expiration date for continuing review.
- **SERIOUS ADVERSE EVENT REPORTING:** All serious problems having to do with subject safety must be reported to the NHSRC within 10 working days using standard forms obtainable from the NHSRC Secretariat.
- **MODIFICATIONS:** Prior NHSRC approval using forms obtainable from the NHSRC Secretariat is required before implementing any changes in the protocol (including changes in the consent documents). You may not use any other consent documents besides those approved by the NHSRC.
- **TERMINATION OF STUDY:** On termination of a study, a report has to be submitted to the NHSRC using standard forms obtainable from the NHSRC Secretariat.
- **QUESTIONS:** Please contact the NHSRC on phone number +265 888 344 443 or by email on [mohdocentre@gmail.com](mailto:mohdocentre@gmail.com).
- **OTHER:** Please be reminded to send in copies of your final research results for our records (Health Research Database).

Kind regards from the NHSRC Secretariat.

For: CHAIRPERSON, NATIONAL HEALTH SCIENCES RESEARCH COMMITTEE

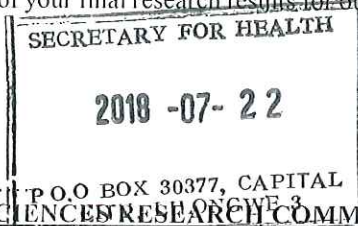

Promoting Ethical Conduct of Research<sup>1</sup>

Executive Committee: Dr B. Chilima (Chairperson), Dr B. Ngwira (Vice-Chairperson)  
Registered with the USA Office for Human Research Protections (OHRP) as an International IRBIRB  
Number IRB00003905 FWA00005976
