# Supplementary material for: Detection of male genital schistosomiasis (MGS) by real-time TaqMan® PCR analysis of semen from fishermen along the southern shoreline of Lake Malawi
Source: PubMed Central journal article supplement (PMC10394912; doi:10.1016/j.heliyon.2023.e17338), 2023-06-21
Supplement: mmc5.pdf [file mmc5.pdf]

## INDIVIDUAL PARTICIPANT QUESTIONNAIRE

### **Research study on Male genital schistosomiasis and HIV among Adult fishermen living in Southern shores of Lake Malawi (MGS Baseline & Follow-up Survey)**

*Explanation: Put a tick (✓) for the participant's responses appropriately. If the boxes are not enough on one page, use another sheet. Return this and other sheets to the Study Investigator at the end.*

Date: (dd/mm/yy): \_\_\_ / \_\_\_ / \_\_\_ Interviewer Name \_\_\_\_\_

#### **Consent checklist**

Has written consent been obtained?    Y     N     *Only proceed if Y*

---

#### **Section A:    Participant's details**

1. Participant ID: \_\_\_\_\_
2. Village: \_\_\_\_\_
3. T/A: \_\_\_\_\_
4. Name of nearest Health centre: \_\_\_\_\_
5. Gender: Male     Female .
6. Date of birth (dd/mm/yy): \_\_\_ / \_\_\_ / \_\_\_    Age: \_\_\_\_\_
7. Born where: \_\_\_\_\_
8. How long have you been staying here: Years \_\_\_\_\_ Months: \_\_\_\_\_ Weeks: \_\_\_\_\_ Days: \_\_\_\_\_
9. Weight (kg): \_\_\_\_\_
10. Height (cm): \_\_\_\_\_

#### **Section B:    General Health Information**

Are you experiencing the following symptoms now? In the last month? Put a tick (✓) for **Yes** on all items mentioned or demonstrated:

|     | <b>Symptom</b>                     | <b>Currently</b> | <b>In last month</b> | <b>Not in last month</b> | <b>Do not know</b> | <b>Refused</b> |
|-----|------------------------------------|------------------|----------------------|--------------------------|--------------------|----------------|
| 11. | Fever                              |                  |                      |                          |                    |                |
| 12. | Headache                           |                  |                      |                          |                    |                |
| 13. | Fatigue                            |                  |                      |                          |                    |                |
| 14. | Abdominal cramping (pain)          |                  |                      |                          |                    |                |
| 15. | Pain during urination (dysuria)    |                  |                      |                          |                    |                |
| 16. | Frequency of urination             |                  |                      |                          |                    |                |
| 17. | Colour of urine                    |                  |                      |                          |                    |                |
| 18. | Blood in urine (haematuria)        |                  |                      |                          |                    |                |
| 19. | Blood in stool                     |                  |                      |                          |                    |                |
| 20. | Blood in semen                     |                  |                      |                          |                    |                |
| 21. | Pains during and / or after coitus |                  |                      |                          |                    |                |
| 22. | Pains on ejaculation               |                  |                      |                          |                    |                |
| 23. | Pains of the genital organs        |                  |                      |                          |                    |                |
| 24. | Other (please specify):            |                  |                      |                          |                    |                |

Are you experiencing the following diseases now? In the last month? Put a tick (✓) for **Yes** on all items mentioned or demonstrated:

|     | Disease                              | Currently | In last month | Not in last month | Don't know | Refused |
|-----|--------------------------------------|-----------|---------------|-------------------|------------|---------|
| 25. | Malaria                              |           |               |                   |            |         |
| 26. | Diarrhoea                            |           |               |                   |            |         |
| 27. | Dysentery                            |           |               |                   |            |         |
| 28. | Skin disease                         |           |               |                   |            |         |
| 29. | Respiratory disease                  |           |               |                   |            |         |
| 30. | Worm infestation                     |           |               |                   |            |         |
| 31. | Schistosomiasis                      |           |               |                   |            |         |
| 32. | Sexually transmitted infection (STI) |           |               |                   |            |         |
| 33. | Other (please specify):              |           |               |                   |            |         |

34. Did you take deworming medicine (albendazole) in the last month? Y  N .

35. Did you take schistosomiasis medicine (praziquantel) in the last month? Y  N .

36. Did you take antimalarial medicine in the last month? Y  N .

37. Did you take any other medicine in the last month? Y  N . If Y, name \_\_\_\_\_

**The following questions are about HIV/AIDS:**

38. Did you attend any meetings about health education in the last month? Y  N .

39. Were any of the meetings about HIV/AIDS? Y  N .

40. Do you know what is HIV? Y  N .

41. Explain your answer in question 40. \_\_\_\_\_

42. Do you know what is AIDS? Y  N .

43. Explain your answer in question 42. \_\_\_\_\_

44. Do you know how HIV is transmitted? Y  N .

45. Explain your answer in question 44. \_\_\_\_\_

46. Do you know how HIV is prevented? Y  N .

47. Explain your answer in question 46. \_\_\_\_\_

48. Have you been tested for HIV? Y  N .

49. If Y in question 48, can you tell us the results? Y  N .

If Y in question 49, tell us the HIV test results? Tick (✓) for the relevant answer below:

50. Positive (+)  .

51. Negative (-)  .

52. Do not remember  .

53. If N in question 48, will you be willing to go for an HIV test? Y  N  .

54. If N in question 53, may you tell us the reason(s)? \_\_\_\_\_  
\_\_\_\_\_  
\_\_\_\_\_

**Section C: Hygiene and Sanitation Information**

55. Do you swim, walk or work in the Lake? Y  N  . (If N, go to question 57).

56. If Y in question 55, how many times in a week? \_\_\_\_\_

57. Do you bathe or wash in the Lake? Y  N  .

58. If Y in question 57, how many times in a week? \_\_\_\_\_

59. If Y in question 57, why do you bathe or wash in the Lake? \_\_\_\_\_  
\_\_\_\_\_  
\_\_\_\_\_

60. Do you wear shoes or long protective wear when in the Lake? Y  N  .

61. If Y in question 60, how many times when in the Lake? \_\_\_\_\_

62. If N in question 60, why do you not wear them? \_\_\_\_\_  
\_\_\_\_\_  
\_\_\_\_\_

63. Where is the main place you go to urinate? \_\_\_\_\_

64. Where is the main place you go to defecate? \_\_\_\_\_

65. Does your house have a toilet? Y  N  .

66. If Y in question 65, do you use it? Y  N  .

67. If Y in question 66, how many times in a week? \_\_\_\_\_

68. If N in question 66, why do you not use it? \_\_\_\_\_  
\_\_\_\_\_  
\_\_\_\_\_

69. If N in question 66, where do you use the toilet? \_\_\_\_\_  
 \_\_\_\_\_

Do you have access to treatments for schistosomiasis? Tick (✓) for the relevant answer below:

70. No, not at all  .

71. Yes  .

72. Do not know  .

73. Refused to answer  .

**Section D: Socio-economic characteristics**

What is your highest level of education? Put a tick (✓) for **Yes** on only one option:

|     | Level of Education                        | Option |
|-----|-------------------------------------------|--------|
| 74. | Never went to school                      |        |
| 75. | Not finished primary school (6 years)     |        |
| 76. | Completed primary school                  |        |
| 77. | Not finished secondary school             |        |
| 78. | Completed secondary school                |        |
| 79. | Not finished tertiary/professional school |        |
| 80. | Completed tertiary/professional school    |        |
| 81. | <i>Don't know</i>                         |        |
| 82. | <i>Refused</i>                            |        |

83. Do you have a job or are you employed? Y  N  .

If Y to question 83, can you tell us the job? Put a tick (✓) for **Yes** on all items mentioned or demonstrated:

|     | Type of Employment / Job       | Yes |
|-----|--------------------------------|-----|
| 84. | Self-employed. <i>Specify:</i> |     |
| 85. | Fishing                        |     |
| 86. | Farming/agriculture            |     |
| 87. | Clerk/administration           |     |
| 88. | Health worker                  |     |
| 89. | Selling at market              |     |
| 90. | <i>Other. Specify:</i>         |     |
| 91. | <i>Refused</i>                 |     |

Other employment status,

|     | Other Job          | Yes |
|-----|--------------------|-----|
| 92. | Doing housework    |     |
| 93. | Student            |     |
| 94. | Retired            |     |
| 95. | Long-term disabled |     |
| 96. | Unemployed         |     |
| 97. | <i>Don't know</i>  |     |
| 98. | <i>Refused</i>     |     |

If Y to question 85 (fishing), can you tell us more about your work by answering the following:

99. How long have you been doing this job? \_\_\_\_\_
100. How often do you go for fishing? \_\_\_\_\_
101. What kind of fish do you catch? \_\_\_\_\_
102. Is the job (fishing) seasonal? Y  N .
103. If Y to question 102, when is the season? \_\_\_\_\_
104. If Y to question 102, what else do you do during off-season period? \_\_\_\_\_  
 \_\_\_\_\_
105. Do you migrate to other places during / after fishing? Y  N . \_\_\_\_\_
106. If Y to question 105, how often do you migrate in a year? \_\_\_\_\_
107. If Y to question 105, where do you migrate to? \_\_\_\_\_
108. If Y to question 105, why do you migrate? \_\_\_\_\_  
 \_\_\_\_\_  
 \_\_\_\_\_
109. Do you own a boat? Y  N .
110. What kind of boat? \_\_\_\_\_
111. Are you planning of getting a new boat? Y  N .
112. What kind of boat? \_\_\_\_\_  
 \_\_\_\_\_

**Regarding marriage and family,**

Can you tell us about your relationship status:

|      | Relationship           | Yes |
|------|------------------------|-----|
| 113. | Married                |     |
| 114. | Co-habiting / engaged  |     |
| 115. | Divorced               |     |
| 116. | Single                 |     |
| 117. | <i>Other. Specify:</i> |     |
| 118. | <i>Refused</i>         |     |

119. Do you have children? Y  N .
120. If Y to question 119, how many? \_\_\_\_\_
121. If N to question 119, why? \_\_\_\_\_  
 \_\_\_\_\_  
 \_\_\_\_\_

122. Has your spouse / partner experienced stillbirth / abortion? Y  N .
123. Have you or your spouse / partner had childlessness after marriage/engaged? Y  N .
124. Has you or your spouse / partner experienced infertility? Y  N .
125. What do you think about pains of genital organs or during / after coitus if you experience it?

---

---

---

126. What do your spouse think about pains of your genital organs or during / after coitus? \_\_\_\_\_

---

---

---

Does your spouse or partner experience the following symptoms:

127. Lower abdominal pain? Y  N . For how long \_\_\_\_\_
128. Pain during / after coitus? Y  N . For how long \_\_\_\_\_
129. Bleeding during / after coitus? Y  N . For how long \_\_\_\_\_
130. Pain during menstruation? Y  N . For how long \_\_\_\_\_
131. Changes of menstrual flow / flow? Y  N . For how long \_\_\_\_\_
132. If Y to any of the symptoms above, what does your spouse think about them? \_\_\_\_\_

---

---

---

133. If Y to any of the symptoms above, what do you think about them? \_\_\_\_\_

---

---

---

134. Any other comments related to issues above? \_\_\_\_\_

---

---

---

**THANK YOU FOR YOUR PARTICIPATION**

## INDIVIDUAL PARTICIPANT QUESTIONNAIRE

### **Research study on Male genital schistosomiasis and HIV among Adult fishermen living in Southern shores of Lake Malawi (MGS-HIV Baseline & Follow-up Survey)**

*Explanation: Put a tick (✓) for the participant's responses appropriately. If the boxes are not enough on one page, use another sheet. Return this and other sheets to the Study Investigator at the end.*

Date: (dd/mm/yy): \_\_\_ / \_\_\_ / \_\_\_ Interviewer Name \_\_\_\_\_

#### **Consent checklist**

Has written consent been obtained?    Y     N     *Only proceed if Y*

---

#### **Section A:    Participant's details**

1. Participant ID: \_\_\_\_\_
2. Village: \_\_\_\_\_
3. T/A: \_\_\_\_\_
4. Name of nearest Health centre: \_\_\_\_\_
5. Gender: Male     Female .
6. Date of birth (dd/mm/yy): \_\_\_ / \_\_\_ / \_\_\_    Age: \_\_\_\_\_
7. Born where: \_\_\_\_\_
8. How long have you been staying here: Years \_\_\_\_\_ Months: \_\_\_\_\_ Weeks: \_\_\_\_\_ Days: \_\_\_\_\_
9. Weight (kg): \_\_\_\_\_
10. Height (cm): \_\_\_\_\_

#### **Section B:    General Health Information**

Are you experiencing the following symptoms now? In the last month? Put a tick (✓) for **Yes** on all items mentioned or demonstrated:

|     | <b>Symptom</b>                     | <b>Currently</b> | <b>In last month</b> | <b>Not in last month</b> | <b>Do not know</b> | <b>Refused</b> |
|-----|------------------------------------|------------------|----------------------|--------------------------|--------------------|----------------|
| 11. | Fever                              |                  |                      |                          |                    |                |
| 12. | Headache                           |                  |                      |                          |                    |                |
| 13. | Fatigue                            |                  |                      |                          |                    |                |
| 14. | Abdominal cramping (pain)          |                  |                      |                          |                    |                |
| 15. | Pain during urination (dysuria)    |                  |                      |                          |                    |                |
| 16. | Frequency of urination             |                  |                      |                          |                    |                |
| 17. | Colour of urine                    |                  |                      |                          |                    |                |
| 18. | Blood in urine (haematuria)        |                  |                      |                          |                    |                |
| 19. | Blood in stool                     |                  |                      |                          |                    |                |
| 20. | Blood in semen                     |                  |                      |                          |                    |                |
| 21. | Pains during and / or after coitus |                  |                      |                          |                    |                |
| 22. | Pains on ejaculation               |                  |                      |                          |                    |                |
| 23. | Pains of the genital organs        |                  |                      |                          |                    |                |
| 24. | Other (please specify):            |                  |                      |                          |                    |                |

Are you experiencing the following diseases now? In the last month? Put a tick (✓) for **Yes** on all items mentioned or demonstrated:

|     | Disease                              | Currently | In last month | Not in last month | Don't know | Refused |
|-----|--------------------------------------|-----------|---------------|-------------------|------------|---------|
| 25. | Malaria                              |           |               |                   |            |         |
| 26. | Diarrhoea                            |           |               |                   |            |         |
| 27. | Dysentery                            |           |               |                   |            |         |
| 28. | Skin disease                         |           |               |                   |            |         |
| 29. | Respiratory disease                  |           |               |                   |            |         |
| 30. | Worm infestation                     |           |               |                   |            |         |
| 31. | Schistosomiasis                      |           |               |                   |            |         |
| 32. | Sexually transmitted infection (STI) |           |               |                   |            |         |
| 33. | Other (please specify):              |           |               |                   |            |         |

34. Did you take deworming medicine (albendazole) in the last month? Y  N .

35. Did you take schistosomiasis medicine (praziquantel) in the last month? Y  N .

36. Did you take antimalarial medicine in the last month? Y  N .

37. Did you take any other medicine in the last month? Y  N . If Y, name \_\_\_\_\_

\_\_\_\_\_

**The following questions are about HIV/AIDS:**

38. Did you attend any meetings about health education in the last month? Y  N .

39. Were any of the meetings about HIV/AIDS? Y  N .

40. Have you experienced any problems after starting ART? Y  N .

41. Did you had any problems also related to genitourinary organs in last 12 months? Y  N .

42. If Y in question 41, may you tell the problems? \_\_\_\_\_

\_\_\_\_\_

\_\_\_\_\_

43. Did you seek any help on the problems said in question 42? Y  N .

44. If Y in question 43, where did you get help? \_\_\_\_\_

45. If Y in question 43, what help were you given? \_\_\_\_\_

\_\_\_\_\_

\_\_\_\_\_

46. If N in question 43, may you tell the reason(s)? \_\_\_\_\_

\_\_\_\_\_

\_\_\_\_\_

47. Will you accept to do a full clinical examination including the genitourinary system? Y  N .



**Section C: Hygiene and Sanitation Information**

48. Did you swim, walk or work in the Lake? Y  N . (If N, go to question 50).

49. If Y in question 48, how many times in a week? \_\_\_\_\_

50. Did you bathe or wash in the Lake? Y  N .

51. If Y in question 50, how many times in a week? \_\_\_\_\_

52. If Y in question 50, why do you bathe or wash in the Lake? \_\_\_\_\_

\_\_\_\_\_  
\_\_\_\_\_

53. Do you wear shoes or long protective wear when in the Lake? Y  N .

54. If Y in question 53, how many times when in the Lake? \_\_\_\_\_

55. If N in question 53, why do you not wear them? \_\_\_\_\_

\_\_\_\_\_  
\_\_\_\_\_

56. Where is the main place you go to urinate? \_\_\_\_\_

57. Where is the main place you go to defecate? \_\_\_\_\_

58. Does your house have a toilet? Y  N .

59. If Y in question 58, do you use it? Y  N .

60. If Y in question 59, how many times in a week? \_\_\_\_\_

61. If N in question 59, why do you not use it? \_\_\_\_\_

\_\_\_\_\_  
\_\_\_\_\_

62. If N in question 59, where do you use the toilet? \_\_\_\_\_

\_\_\_\_\_

Do you have access to treatments for schistosomiasis? Tick (✓) for the relevant answer below:

63. No, not at all .

64. Yes .

65. Do not know .

66. Refused to answer .

**Section D: Socio-economic characteristics**

What is your highest level of education? Put a tick (✓) for **Yes** on only one option:

|     | Level of Education                        | Option |
|-----|-------------------------------------------|--------|
| 67. | Never went to school                      |        |
| 68. | Not finished primary school (6 years)     |        |
| 69. | Completed primary school                  |        |
| 70. | Not finished secondary school             |        |
| 71. | Completed secondary school                |        |
| 72. | Not finished tertiary/professional school |        |
| 73. | Completed tertiary/professional school    |        |
| 74. | <i>Don't know</i>                         |        |
| 75. | <i>Refused</i>                            |        |

76. Do you have a job or are you employed? Y  N .

If Y to question 76, can you tell us the job? Put a tick (✓) for **Yes** on all items mentioned or demonstrated:

|     | Type of Employment / Job       | Yes |
|-----|--------------------------------|-----|
| 77. | Self-employed. <i>Specify:</i> |     |
| 78. | Fishing                        |     |
| 79. | Farming/agriculture            |     |
| 80. | Clerk/administration           |     |
| 81. | Health worker                  |     |
| 82. | Selling at market              |     |
| 83. | <i>Other. Specify:</i>         |     |
| 84. | <i>Refused</i>                 |     |

Other employment status,

|     | Other Job          | Yes |
|-----|--------------------|-----|
| 85. | Doing housework    |     |
| 86. | Student            |     |
| 87. | Retired            |     |
| 88. | Long-term disabled |     |
| 89. | Unemployed         |     |
| 90. | <i>Don't know</i>  |     |
| 91. | <i>Refused</i>     |     |

If Y to question 78 (fishing), can you tell us more about your work by answering the following:

92. How long have you been doing this job? \_\_\_\_\_

93. How often do you go for fishing? \_\_\_\_\_

94. What kind of fish do you catch? \_\_\_\_\_

95. Is the job (fishing) seasonal? Y  N .

96. If Y to question 95, when is the season? \_\_\_\_\_

97. If Y to question 95, what else do you do during off-season period? \_\_\_\_\_

\_\_\_\_\_

98. Do you migrate to other places during / after fishing? Y  N .

99. If Y to question 98, how often do you migrate in a year? \_\_\_\_\_

100. If Y to question 98, where do you migrate to? \_\_\_\_\_

101. If Y to question 98, why do you migrate? \_\_\_\_\_  
\_\_\_\_\_  
\_\_\_\_\_

102. Do you own a boat? Y  N .

103. What kind of boat? \_\_\_\_\_

104. Are you planning of getting a new boat? Y  N .

105. What kind of boat? \_\_\_\_\_  
\_\_\_\_\_

**Regarding marriage and family,**

Can you tell us about your relationship status:

|      | <b>Relationship</b>    | <b>Yes</b> |
|------|------------------------|------------|
| 106. | Married                |            |
| 107. | Co-habiting / engaged  |            |
| 108. | Divorced               |            |
| 109. | Single                 |            |
| 110. | <i>Other. Specify:</i> |            |
| 111. | <i>Refused</i>         |            |

112. Do you have children? Y  N .

113. If Y to question 112, how many? \_\_\_\_\_

114. If N to question 112, why? \_\_\_\_\_  
\_\_\_\_\_  
\_\_\_\_\_

115. Has your spouse / partner experienced stillbirth / abortion? Y  N .

116. Have you or your spouse / partner had childlessness after marriage/engaged? Y  N .

117. Has you or your spouse / partner experienced infertility? Y  N .

118. What do you think about pains of genital organs or during / after coitus if you experience it?  
\_\_\_\_\_  
\_\_\_\_\_  
\_\_\_\_\_

119. What do your spouse think about pains of your genital organs or during / after coitus? \_\_\_\_\_

---

---

---

---

Does your spouse or partner experience the following symptoms:

120. Lower abdominal pain? Y  N  . For how long \_\_\_\_\_

121. Pain during / after coitus? Y  N  . For how long \_\_\_\_\_

122. Bleeding during / after coitus? Y  N  . For how long \_\_\_\_\_

123. Pain during menstruation? Y  N  . For how long \_\_\_\_\_

124. Changes of menstrual flow / flow? Y  N  . For how long \_\_\_\_\_

125. If Y to any of the symptoms above, what does your spouse think about them? \_\_\_\_\_

---

---

---

---

126. If Y to any of the symptoms above, what do you think about them? \_\_\_\_\_

---

---

---

---

127. Any other comments related to issues above? \_\_\_\_\_

---

---

---

**THANK YOU FOR YOUR PARTICIPATION**
